# Supplementary material for: Impaired Mitophagy of Nucleated Erythroid Cells Leads to Anemia in Patients with Myelodysplastic Syndromes
Source: Hindawi journal article supplement (doi:10.1155/2018/6328051), 2018-01-01

Supplementary figure 1 The LC3 expression in GlycoA+ NRBC from MDS (n=3) and controls (n=2).

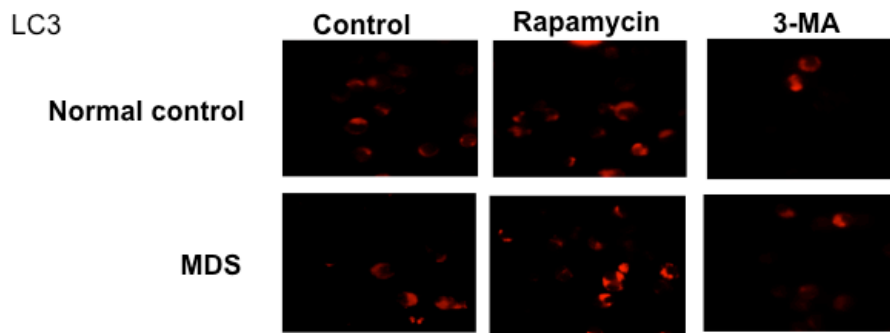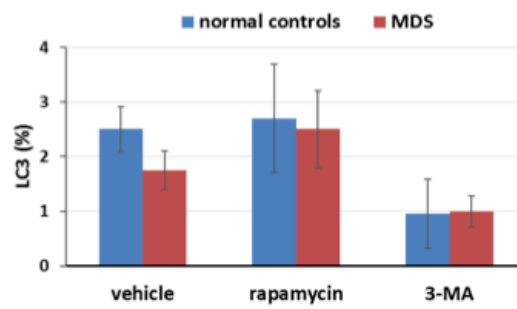

Supplement: f1 [file 6328051.f1.pdf]
